# Supplementary material for: La reforma concursal. Breu exposició esquemàtica de la Llei Orgànica 8/2003, de 9 de juliol
Source: MDPI journal article supplement (doi:10.3390/foods12152897), 2005-01-01
Supplement: s1 [file s1]

*Supplementary materials for*

**Enhanced production of  $\beta$ -Nicotinamide mononucleotide with exogenous nicotinamide addition in *Saccharomyces boulardii*-YS01**

Meijie Song <sup>1</sup>, Chunhua Yin <sup>1</sup>, Qianqian Xu <sup>1</sup>, Yang Liu <sup>1</sup>, Haiyang Zhang <sup>1</sup>, Xiaolu Liu <sup>1</sup>, Hai Yan <sup>1,\*</sup>

<sup>1</sup>School of Chemistry and Biological Engineering, University of Science and Technology Beijing, Beijing 100083, China; meijie\_song@126.com (M.S.); chyin@ustb.edu.cn (C.Y.); qianqianxu@ustb.edu.cn (Q.X.); liuyang@ustb.edu.cn (L.Y.); zhanghy@ustb.edu.cn (H.Z.); xiaoluliu@ustb.edu.cn (X.L.)

\*Correspondence: haiyan@ustb.edu.cn (H.Y.)

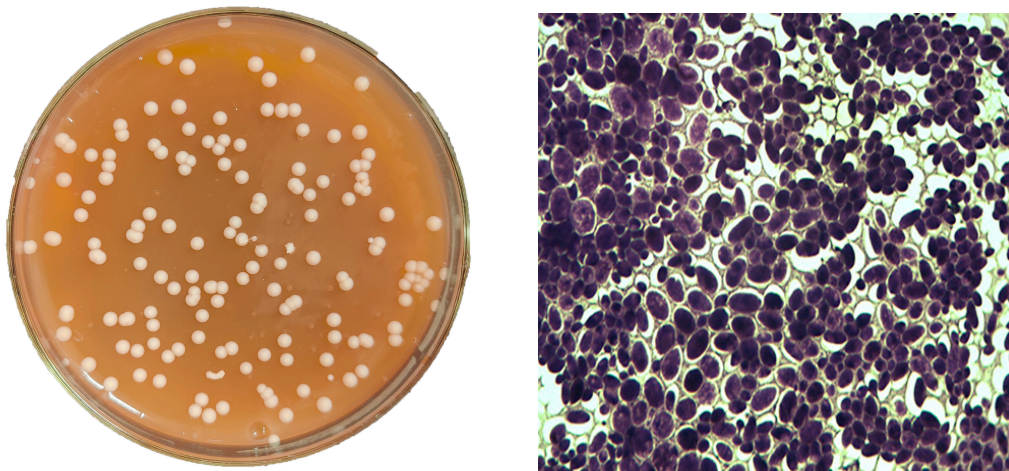

**Figure S1.** The morphological features of *S. boulardii*-YS01 colonies on agar medium and Gram-staining micrograph.

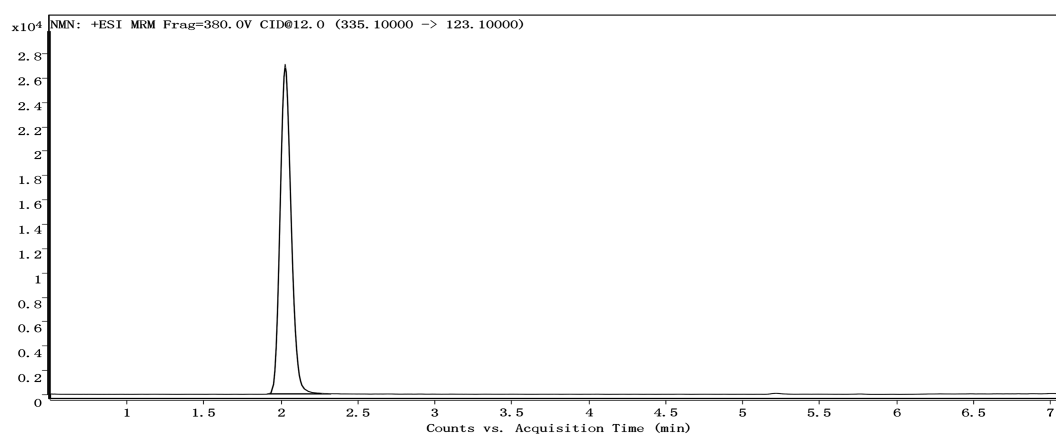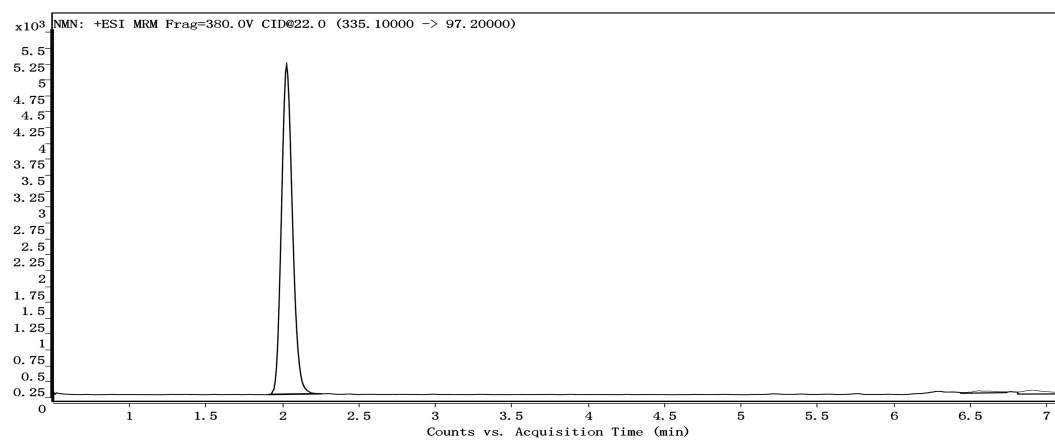

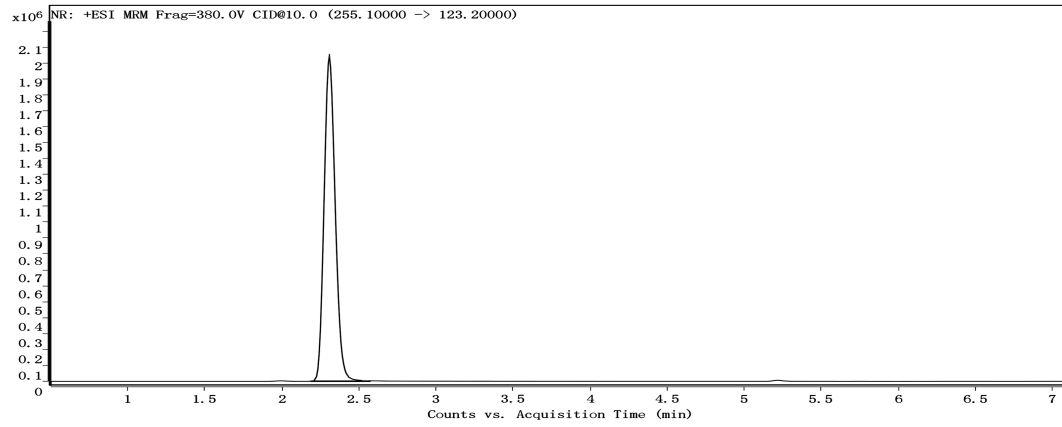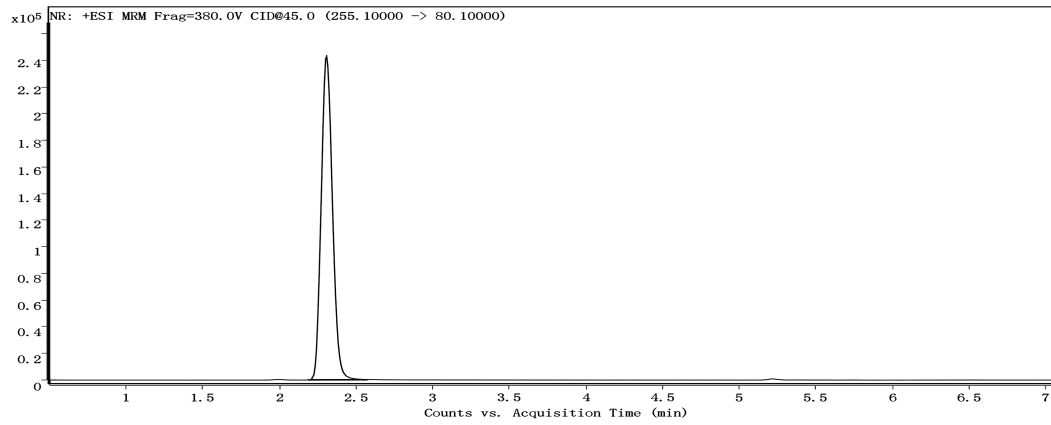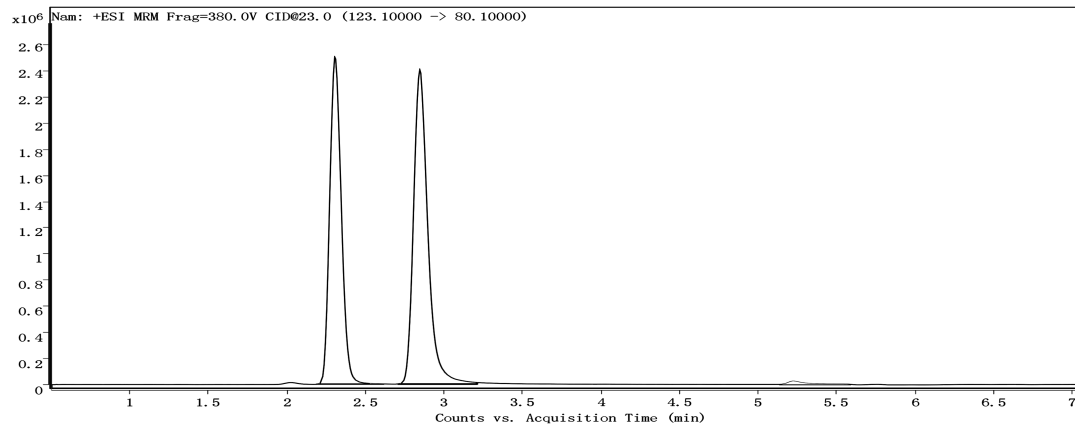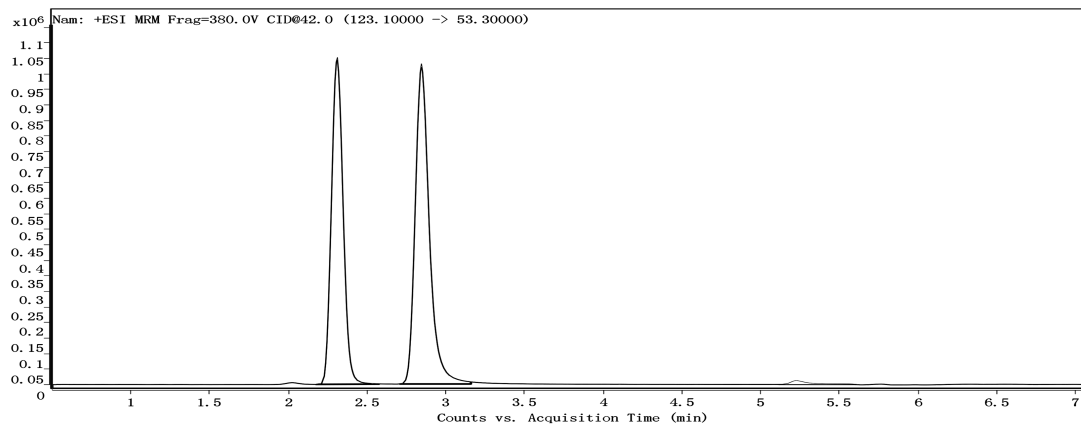

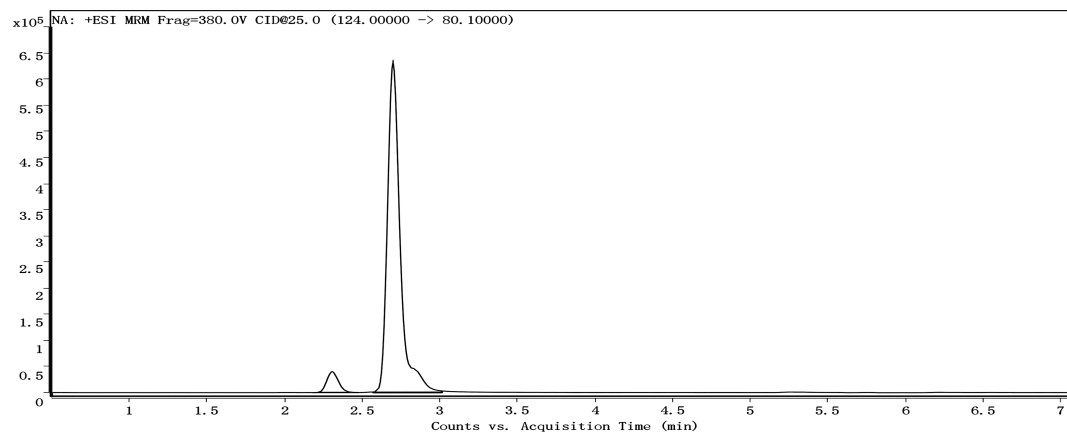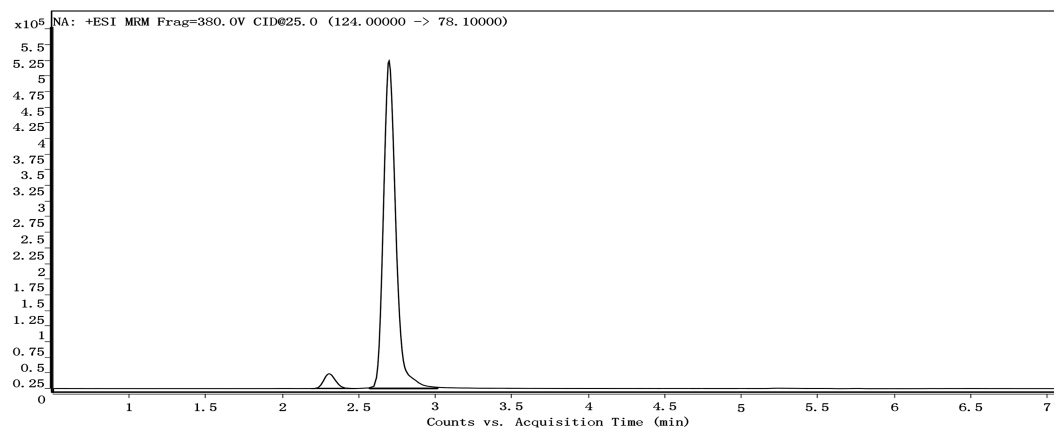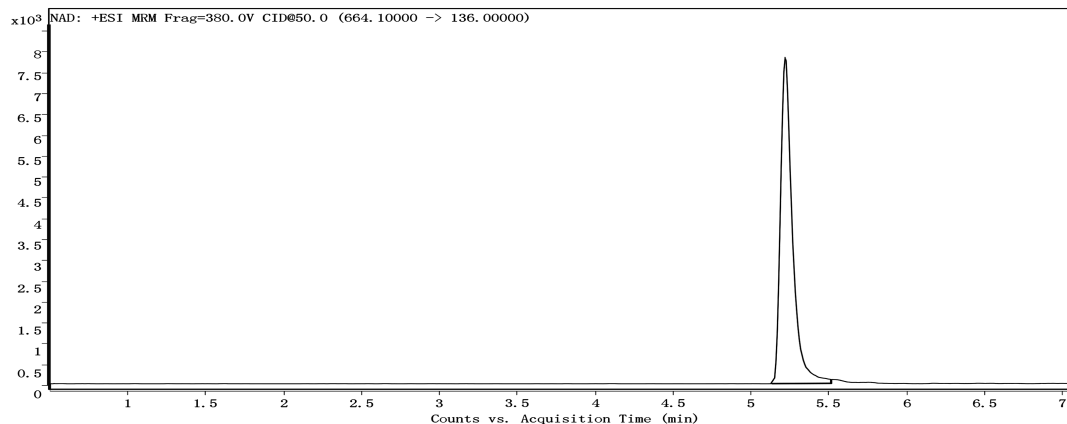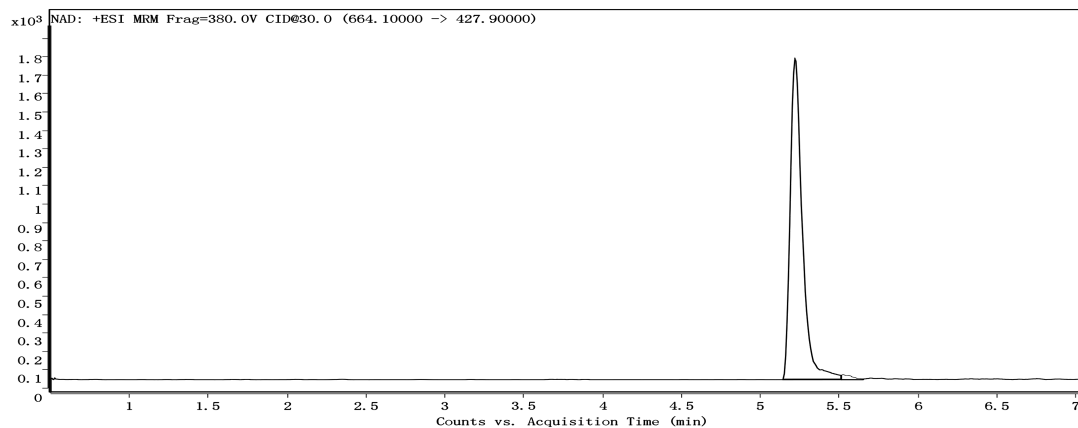

**Figure S2.** The chromatograms of five analytes under multiple reaction monitoring mode.

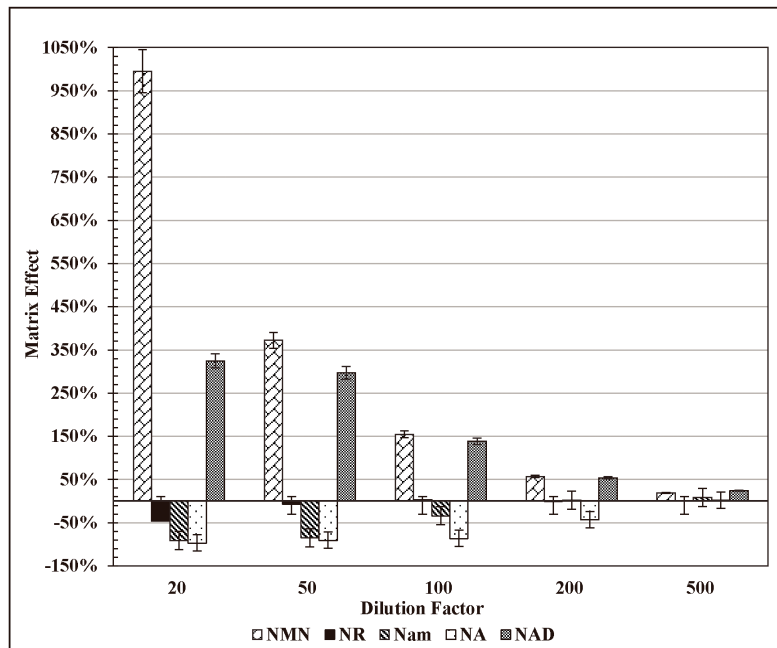

**Figure S3.** The matrix effects of  $\beta$ -nicotinamide mononucleotide (NMN), nicotinamide nucleoside (NR), nicotinic acid (NA), nicotinamide (Nam) and nicotinamide adenine dinucleotide (NAD<sup>+</sup>) in *S. boulardii*-YS01 were determined at five dilution factors ranging from 20 to 500.

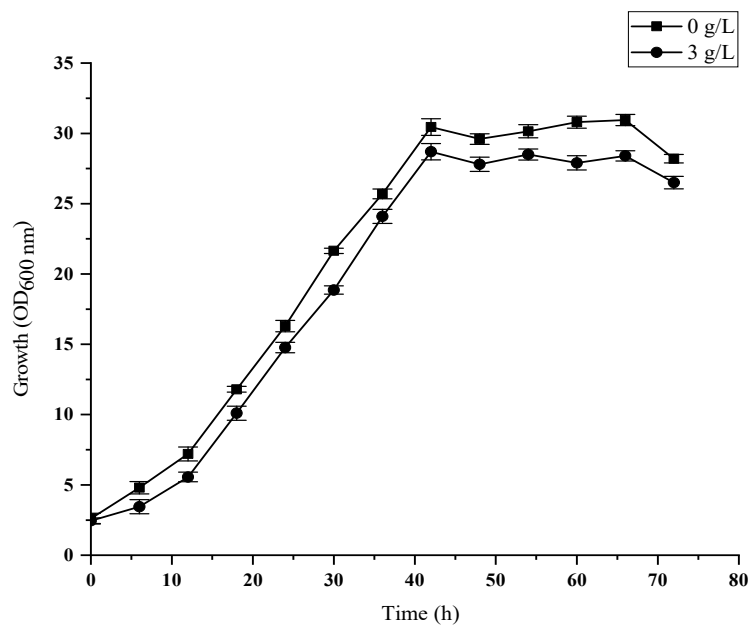

**Figure S4.** The effect of Nam addition on the growth of *S. boulardii*-YS01.

(A)

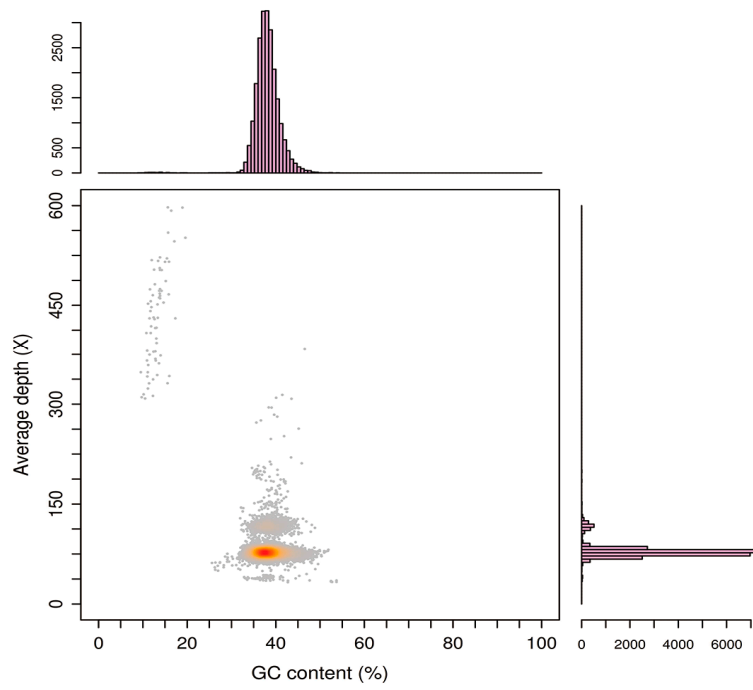

(B)

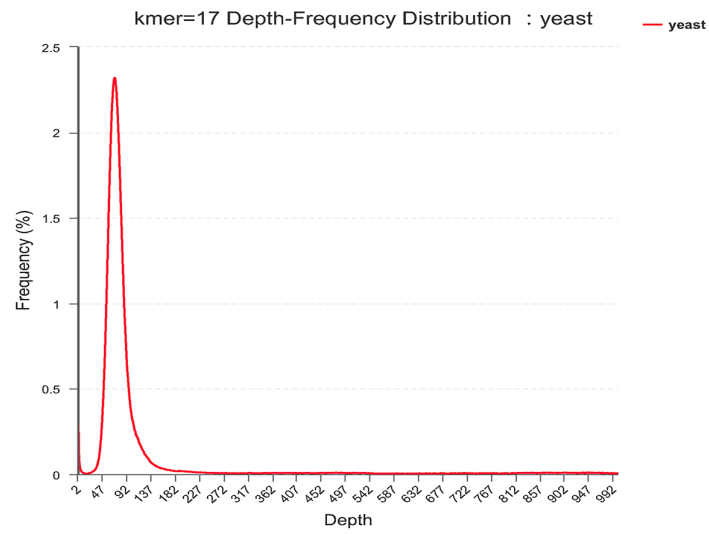

**Figure S5.** Analysis of GC-depth and K-mer frequency distribution of *S. boulardii*-YS01, (A) GC-depth point diagram, (B) K-mer frequency diagram.

(A)

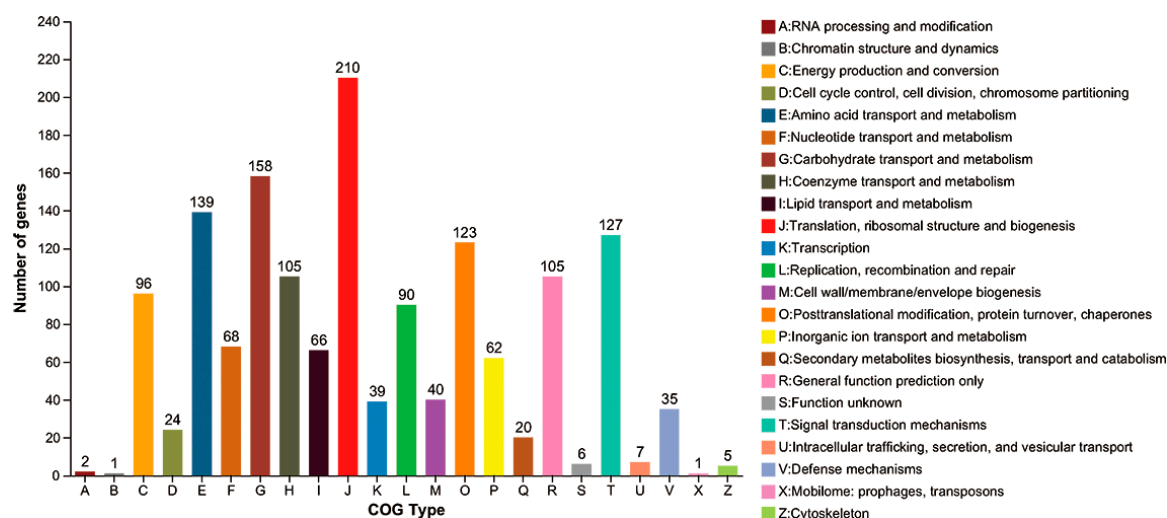

(B)

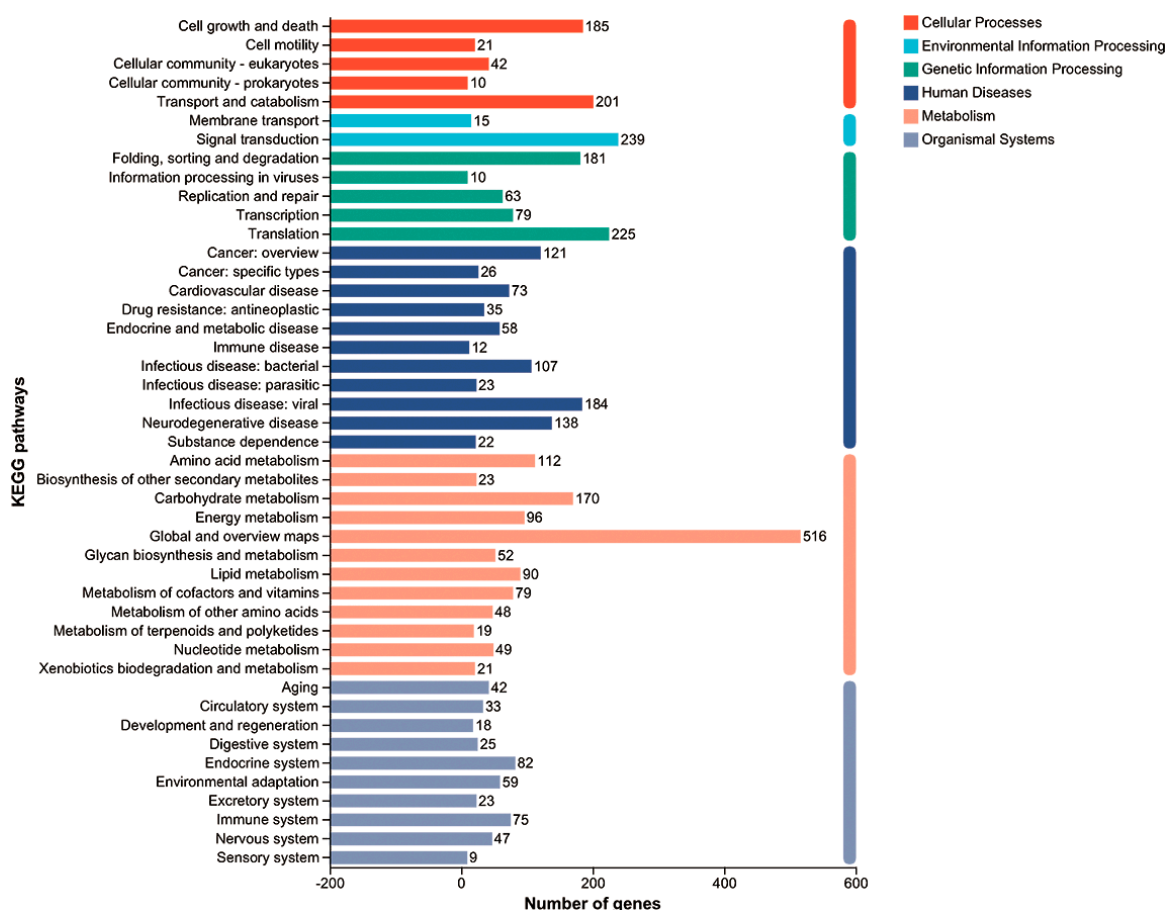

**Figure S6.** Statistical legend of gene annotation classification of *S. boulardii*-YS01, (A) COG function classification, (B) Histogram of KEGG.

(A)

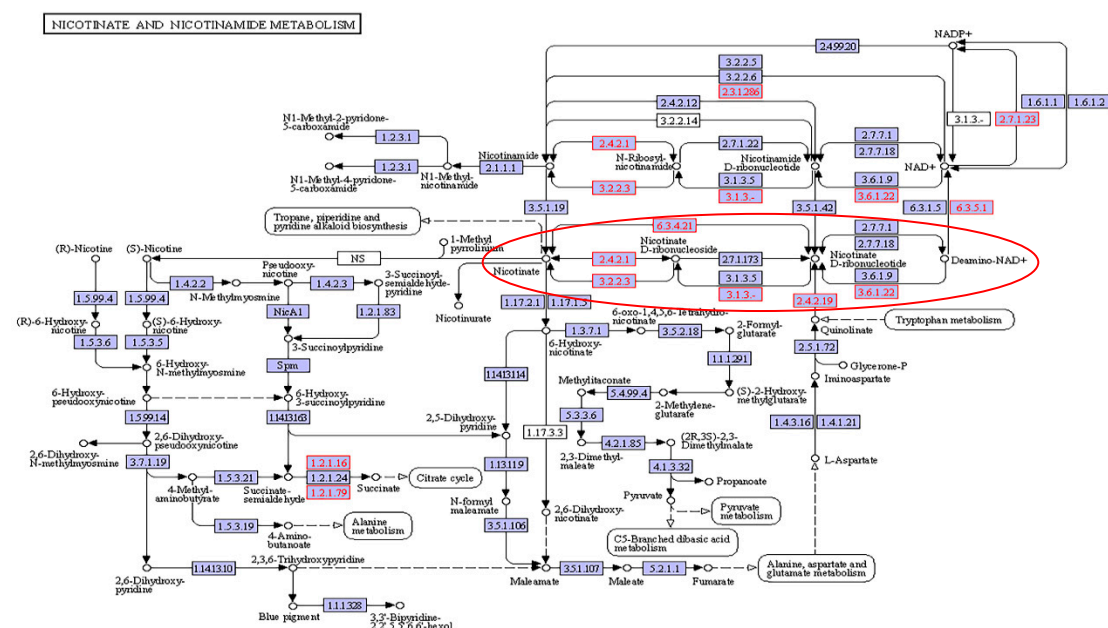

(B)

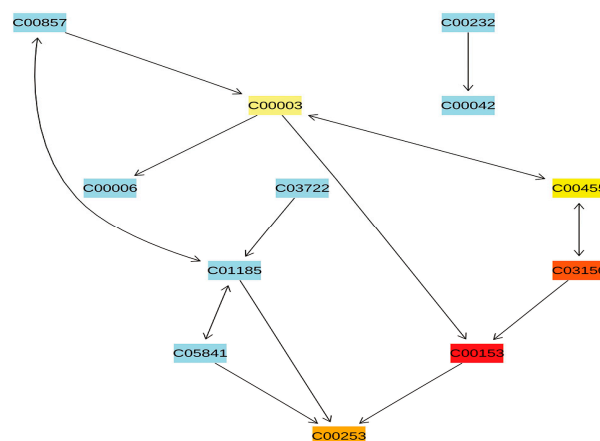

| Query                             | Hit                   | HMDB                                                                            | PubChem                                                               | KEGG                                                                  | Details |
|-----------------------------------|-----------------------|---------------------------------------------------------------------------------|-----------------------------------------------------------------------|-----------------------------------------------------------------------|---------|
| β-Nicotinamide mononucleotide     | Nicotinamide ribotide | <a href="https://pubchem.ncbi.nlm.nih.gov/compound/HMDB0000229">HMDB0000229</a> | <a href="https://pubchem.ncbi.nlm.nih.gov/compound/14180">14180</a>   | <a href="https://pubchem.ncbi.nlm.nih.gov/compound/C00455">C00455</a> |         |
| nicotinamide riboside             | Nicotinamide riboside | <a href="https://pubchem.ncbi.nlm.nih.gov/compound/HMDB0000855">HMDB0000855</a> | <a href="https://pubchem.ncbi.nlm.nih.gov/compound/439924">439924</a> | <a href="https://pubchem.ncbi.nlm.nih.gov/compound/C03150">C03150</a> |         |
| nicotinic acid                    | Nicotinic acid        | <a href="https://pubchem.ncbi.nlm.nih.gov/compound/HMDB0001488">HMDB0001488</a> | <a href="https://pubchem.ncbi.nlm.nih.gov/compound/938">938</a>       | <a href="https://pubchem.ncbi.nlm.nih.gov/compound/C00253">C00253</a> |         |
| nicotinamide                      | Niacinamide           | <a href="https://pubchem.ncbi.nlm.nih.gov/compound/HMDB0001406">HMDB0001406</a> | <a href="https://pubchem.ncbi.nlm.nih.gov/compound/936">936</a>       | <a href="https://pubchem.ncbi.nlm.nih.gov/compound/C00153">C00153</a> |         |
| nicotinamide adenine dinucleotide | NAD                   | <a href="https://pubchem.ncbi.nlm.nih.gov/compound/HMDB0000902">HMDB0000902</a> | <a href="https://pubchem.ncbi.nlm.nih.gov/compound/5893">5893</a>     | <a href="https://pubchem.ncbi.nlm.nih.gov/compound/C00003">C00003</a> |         |

**Figure S7.** The pathway analysis of *S. boulardii*-YS01, (A) the signaling pathway based on KEGG annotation (NA generation pathway was circled in red), (B) the pathway analysis based on quantification data.



**Table S1** The average content of five analytes in different *S. boulardii*-YS01 samples (n=3).

| Sample | Group | NMN           | NR           | NA             | Nam          | NAD <sup>+</sup> |
|--------|-------|---------------|--------------|----------------|--------------|------------------|
| 0-1 h  | 0     | 0.24 ± 1.60   | 0.52 ± 1.21  | 0.3589 ± 4.48  | 0.41 ± 2.21  | 4.81 ± 5.61      |
| 0-12 h | 0     | 32.12 ± 4.32  | 8.54 ± 1.27  | 4.89 ± 9.56    | 6.59 ± 1.42  | 46.50 ± 6.26     |
| 0-24 h | 0     | 57.93 ± 5.66  | 17.10 ± 2.63 | 19.26 ± 13.98  | 12.91 ± 2.01 | 29.49 ± 4.32     |
| 0-36 h | 0     | 71.85 ± 6.43  | 15.98 ± 2.90 | 14.46 ± 10.90  | 12.39 ± 1.98 | 37.88 ± 4.10     |
| 0-48 h | 0     | 100.57 ± 8.72 | 14.13 ± 3.36 | 0.83 ± 6.97    | 10.44 ± 1.69 | 56.02 ± 5.13     |
| 0-60 h | 0     | 98.78 ± 6.12  | 17.59 ± 2.10 | 0.97 ± 8.56    | 13.59 ± 4.12 | 86.97 ± 6.02     |
| 0-72 h | 0     | 103.40 ± 5.90 | 14.40 ± 2.93 | 7.63 ± 11.75   | 11.30 ± 1.72 | 92.37 ± 4.73     |
| 3-1 h  | 3     | 0.26 ± 2.70   | 0.62 ± 2.09  | 0.86 ± 5.76    | 0.28 ± 1.40  | 3.85 ± 3.41      |
| 3-12 h | 3     | 33.84 ± 5.34  | 8.30 ± 1.54  | 104.41 ± 8.41  | 6.28 ± 2.08  | 70.76 ± 5.46     |
| 3-24 h | 3     | 58.13 ± 3.20  | 20.38 ± 2.36 | 220.51 ± 9.10  | 15.14 ± 2.70 | 42.58 ± 6.04     |
| 3-36 h | 3     | 86.79 ± 5.31  | 25.14 ± 3.46 | 193.30 ± 12.87 | 19.45 ± 2.35 | 43.06 ± 4.31     |
| 3-48 h | 3     | 126.71 ± 6.92 | 16.91 ± 2.30 | 145.47 ± 13.60 | 13.55 ± 2.20 | 57.33 ± 3.24     |
| 3-60 h | 3     | 137.36 ± 8.40 | 15.82 ± 1.49 | 167.37 ± 9.89  | 11.82 ± 3.49 | 62.52 ± 5.39     |
| 3-72 h | 3     | 128.75 ± 6.75 | 15.56 ± 1.75 | 189.54 ± 10.70 | 11.52 ± 3.10 | 104.4 ± 6.86     |

Notes: Values are mean ± standard deviation of at three replicates. 0 means without Nam addition and 3 means 3 g/L of Nam addition in the culture medium of *S. boulardii*-YS01. Abbreviations:  $\beta$ -nicotinamide mononucleotide (NMN), nicotinamide riboside (NR), nicotinic acid (NA), nicotinamide (Nam), nicotinamide adenine dinucleotide (NAD<sup>+</sup>).

**Table S2** The annotation statistics of *S. boulardii*-YS01 gene-encoded proteins in different databases.

| Database name | Non-Redundant Protein Sequence Database | Swiss-Prot | Pfam | Gene Ontology |
|---------------|-----------------------------------------|------------|------|---------------|
| Gene number   | 17234                                   | 16244      | 2961 | 2441          |
